# Supplementary material for: Effect of Achillea fragrantissima Extract on Excision Wound Biofilms of MRSA and Pseudomonas aeruginosa in Diabetic Mice
Source: MDPI journal article supplement (doi:10.3390/ijms24119774), 2023-06-05
Supplement: s1 [file s1]

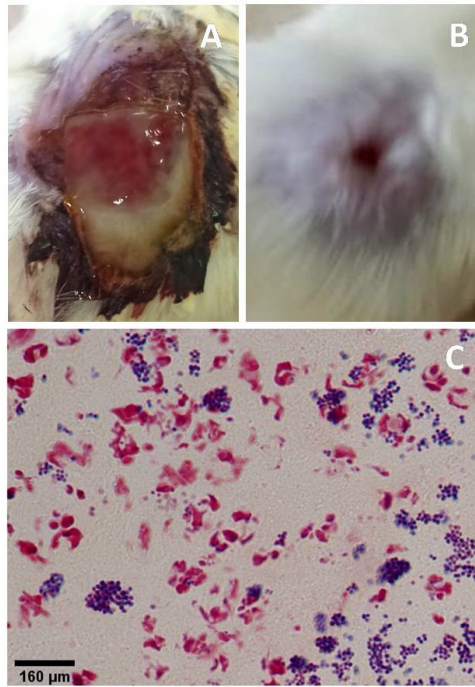

**Figure S1.** Representative images showing inflicted wound (A) and healed wound (B) on mouse skin. Histological examination (modified gram stain, 1000×) of wounded tissue indicating formation of biofilm on the wounded tissue (C).
